# Supplementary material for: Red Blood Cell Distribution Width-to-Albumin Ratio as Novel Biomarker Predicting Mortality in Cardiovascular Disease: A Systematic Review and Dose-Response Meta-Analysis
Source: Research Square preprint supplement (doi:10.21203/rs.3.rs-4185672/v1), 2024-04-18
Supplement: Supplementary file 1 [file 11a158107424cf533cb37624.pdf]

**Red Blood Cell Distribution Width-to-Albumin Ratio as Novel Biomarker Predicting  
Mortality in Cardiovascular Disease: A Systematic Review and Dose-Response Meta  
Analysis  
Supplementary Materials**

**Table of Contents**

|                                                                                                              |           |
|--------------------------------------------------------------------------------------------------------------|-----------|
| <b><i>Additional Data</i></b> .....                                                                          | <b>1</b>  |
| Table S1. Newcastle-Ottawa Scale.....                                                                        | 1         |
| <b><i>Primary Endpoints</i></b> .....                                                                        | <b>2</b>  |
| Table S2. Summary of pooled outcomes.....                                                                    | 2         |
| Table S3. Dose-response associations between RAR values and mortality .....                                  | 2         |
| Figure S1. Forest plot of 30-day mortality pooled HR using random-effect model .....                         | 3         |
| Figure S2. Forest plot of 90-day mortality pooled HR using random-effect model .....                         | 3         |
| Figure S3. Forest plot of 1-year mortality pooled HR using random-effect model .....                         | 4         |
| Figure S4. Forest plot of 3-year mortality pooled HR using random-effect model .....                         | 4         |
| Figure S5. Forest plot of in-hospital mortality pooled HR using random-effect model ...                      | 4         |
| <b><i>Secondary Endpoints</i></b> .....                                                                      | <b>5</b>  |
| Figure S6. Forest plot of length of ICU stay using random-effect model .....                                 | 5         |
| Figure S7. Forest plot of length of hospital stay using random-effect model .....                            | 5         |
| <b><i>Sensitivity Analysis</i></b> .....                                                                     | <b>6</b>  |
| Table S4. Results comparison of different meta-analysis models and between-study<br>variance estimators..... | 6         |
| Figure S8. Leave-one-out meta-analysis .....                                                                 | 7         |
| <b><i>Meta-regression</i></b> .....                                                                          | <b>8</b>  |
| Table S5. Data used for meta-regression analysis* .....                                                      | 8         |
| Table S6. Summary of meta-regression analysis.....                                                           | 8         |
| <b><i>Publication Bias</i></b> .....                                                                         | <b>9</b>  |
| Figure S9. Funnel plot of overall mortality pooled HR using random-effect model .....                        | 9         |
| Figure S10. Funnel plot of 30-day mortality pooled HR using random-effect model .....                        | 9         |
| Figure S11. Funnel plot of 90-day mortality pooled HR using random-effect model .....                        | 10        |
| Figure S12. Funnel plot of 1-year mortality pooled HR using random-effect model .....                        | 10        |
| Figure S13. Funnel plot of 3-year mortality pooled HR using random-effect model .....                        | 11        |
| <b><i>PRISMA 2020 Checklist</i></b> .....                                                                    | <b>12</b> |
| Table S7. PRISMA 2020 Checklist.....                                                                         | 12        |

## ADDITIONAL DATA

**Table S1. Newcastle-Ottawa Scale**

| No. | Author, year               | Selection | Comparability | Outcomes | NOS Scale | Interpretation |
|-----|----------------------------|-----------|---------------|----------|-----------|----------------|
| 1   | Long <i>et al.</i> , 202   | 3         | 2             | 2        | 7         | Good Quality   |
| 2   | Li <i>et al.</i> , 2022    | 3         | 2             | 3        | 8         | Good Quality   |
| 3   | Gu <i>et al.</i> , 2022    | 4         | 2             | 2        | 8         | Good Quality   |
| 4   | Jian <i>et al.</i> , 2023  | 4         | 2             | 2        | 8         | Good Quality   |
| 5   | Chen <i>et al.</i> , 2023  | 3         | 2             | 3        | 8         | Good Quality   |
| 6   | Wang <i>et al.</i> , 2023  | 3         | 2             | 3        | 9         | Good Quality   |
| 7   | Meng <i>et al.</i> , 2023  | 3         | 2             | 3        | 8         | Good Quality   |
| 8   | Ni <i>et al.</i> , 2022    | 3         | 2             | 2        | 7         | Good Quality   |
| 9   | Zhao <i>et al.</i> , 2021  | 3         | 2             | 2        | 7         | Good Quality   |
| 10  | Li <i>et al.</i> , 2022    | 3         | 2             | 3        | 8         | Good Quality   |
| 11  | Liu <i>et al.</i> , 2022   | 3         | 2             | 3        | 8         | Good Quality   |
| 12  | Weng <i>et al.</i> , 2022  | 3         | 2             | 3        | 8         | Good Quality   |
| 13  | Ding <i>et al.</i> , 2023  | 3         | 2             | 3        | 8         | Good Quality   |
| 14  | Zhang <i>et al.</i> , 2023 | 4         | 2             | 3        | 9         | Good Quality   |
| 15  | Zhao <i>et al.</i> , 2023  | 3         | 2             | 3        | 8         | Good Quality   |
| 16  | Zhou <i>et al.</i> , 2024  | 3         | 2             | 3        | 8         | Good Quality   |

## PRIMARY ENDPOINTS

**Table S2.** Summary of pooled outcomes

| No | Outcomes                      | No. of<br>inputs/studies | Effect<br>measures | EM<br>(95%CI)            | p value | Heterogeneity  |                  |         | Publication<br>Bias |
|----|-------------------------------|--------------------------|--------------------|--------------------------|---------|----------------|------------------|---------|---------------------|
|    |                               |                          |                    |                          |         | I <sup>2</sup> | tau <sup>2</sup> | p value |                     |
| 1  | Overall<br>ACM                | 18                       | HR                 | 1.88<br>(1.59 -<br>2.23) | <0.0001 | 91%            | 0.082            | <0.001  | 0.001               |
| 2  | Adjusted<br>Overall<br>ACM*   | 16                       |                    | 2.02<br>(1.75 -<br>2.32) | <0.0001 | 59%            | 0.034            | <0.001  | 0.01                |
| 3  | 30-day<br>ACM                 | 10                       |                    | 1.92<br>(1.48 -<br>2.48) | <0.001  | 86%            | 0.062            | <0.001  |                     |
| 4  | 90-day<br>ACM                 | 5                        |                    | 2.38<br>(1.61 -<br>3.53) | 0.035   | 59%            | 0.056            | <0.001  |                     |
| 5  | 1-year<br>ACM                 | 8                        |                    | 2.17<br>(1.73 -<br>2.71) | <0.0001 | 59%            | 0.035            | <0.001  |                     |
| 6  | 3-year<br>ACM                 | 4                        |                    | 1.99<br>(0.93 -<br>4.27) | 0.064   | 93%            | 0.198            | <0.001  |                     |
| 7  | In-hospital<br>ACM            | 4                        | SMD                | 1.77<br>(1.20 -<br>2.61) | 0.019   | 50%            | 0.025            | <0.001  |                     |
| 8  | Length of<br>hospital<br>stay | 3                        |                    | 0.62<br>(0.21 -<br>1.03) | 0.022   | 91%            | 0.015            | <0.001  |                     |
| 9  | Length of<br>ICU stay         | 5                        |                    | 0.46<br>(0.14 -<br>0.77) | 0.015   | 95%            | 0.047            | <0.001  |                     |

Abbreviations: ACM, All-cause mortality; SMD, Standardized Mean Difference; EM, Effect measures

\*Removed Zhang-MIMIC, 2023 and Zhao (Ischemic), 2023

**Table S3.** Dose-response associations between RAR values and mortality

| RAR (ml/g) | Predicted Hazard Ratio (95%CI) |                    |
|------------|--------------------------------|--------------------|
|            | Linear                         | Spline             |
| 0          | 0.48 (0.37 - 0.64)             | 0.23 (0.13 - 0.42) |
| 1          | 0.62 (0.51 - 0.74)             | 0.37 (0.25 - 0.56) |
| 2          | 0.79 (0.72 - 0.86)             | 0.61 (0.50 - 0.75) |
| 3          | Reference                      |                    |
| 4          | 1.27 (1.16 - 1.39)             | 1.53 (1.29 - 1.80) |

|    |                     |                    |
|----|---------------------|--------------------|
| 5  | 1.62 (1.35 - 1.94)  | 1.97 (1.54 - 2.53) |
| 6  | 2.06 (1.57 - 2.71)  | 2.24 (1.71 - 2.93) |
| 7  | 2.63 (1.83 - 3.78)  | 2.40 (1.84 - 3.13) |
| 8  | 3.35 (2.13 - 5.27)  | 2.56 (1.96 - 3.36) |
| 9  | 4.26 (2.47 - 7.34)  | 2.74 (2.08 - 3.61) |
| 10 | 5.43 (2.88 - 10.24) | 2.93 (2.19 - 3.91) |

**Figure S1.** Forest plot of 30-day mortality pooled HR using random-effect model (Zhao 2021 removed due to overlapping population and outcome with Zhao 2023)

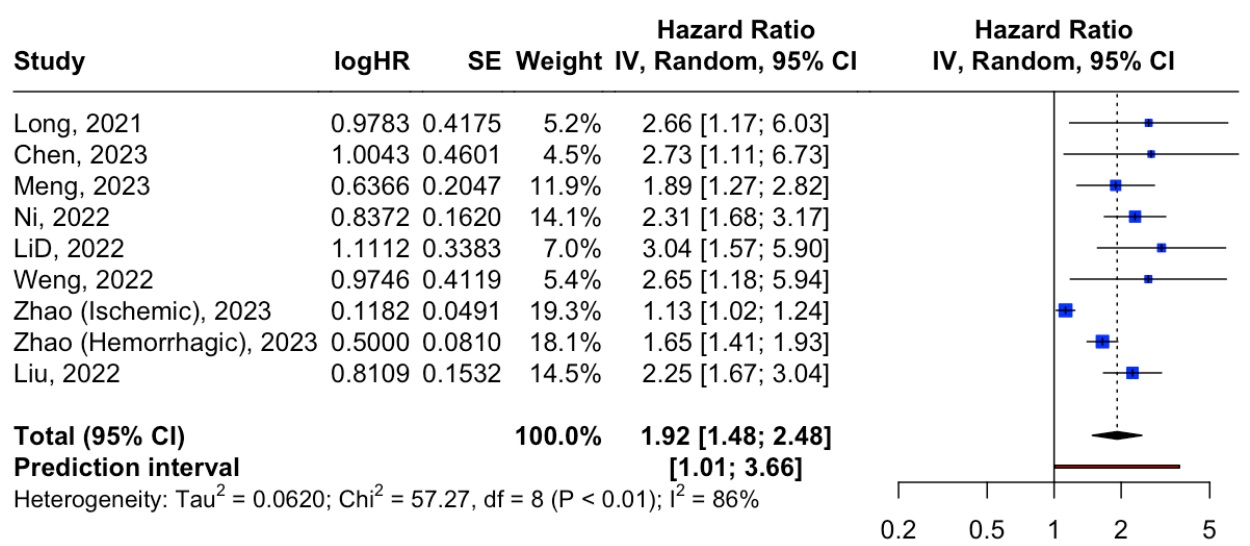

**Figure S2.** Forest plot of 90-day mortality pooled HR using random-effect model

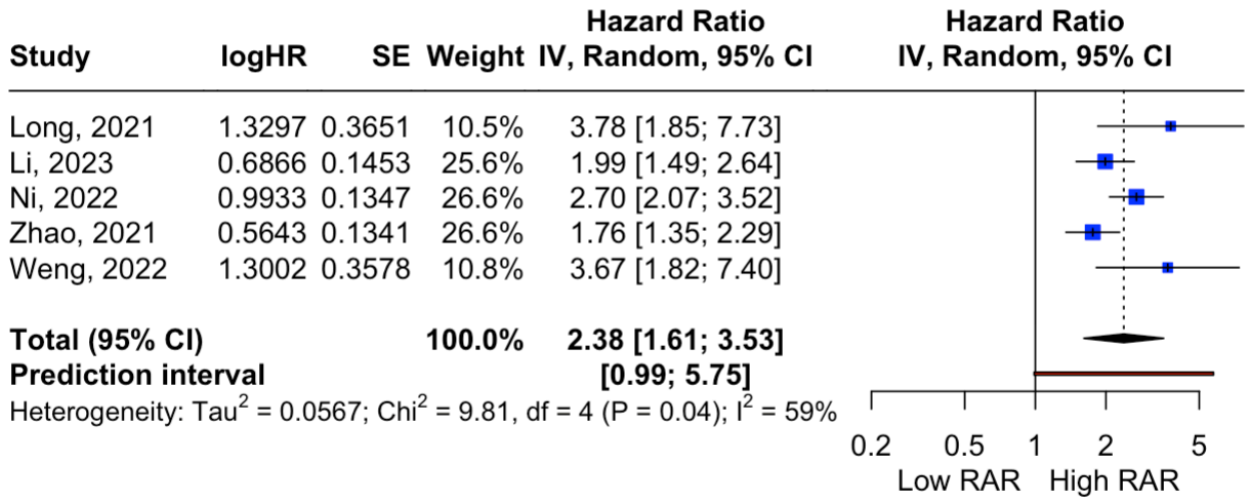

**Figure S3.** Forest plot of 1-year mortality pooled HR using random-effect model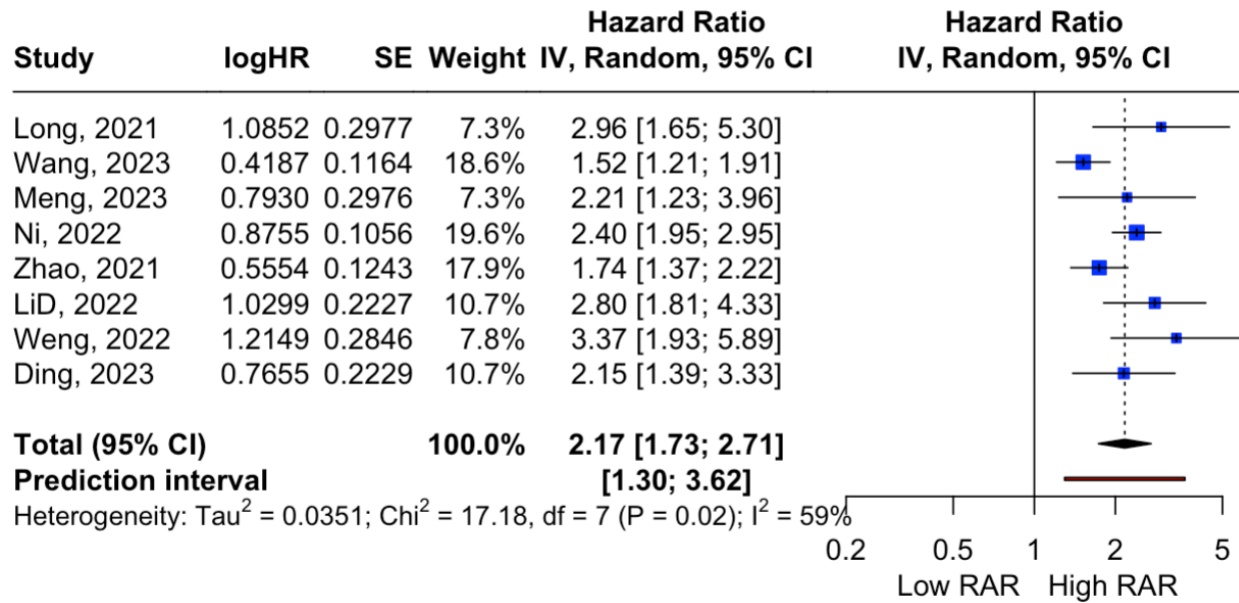**Figure S4.** Forest plot of 3-year mortality pooled HR using random-effect model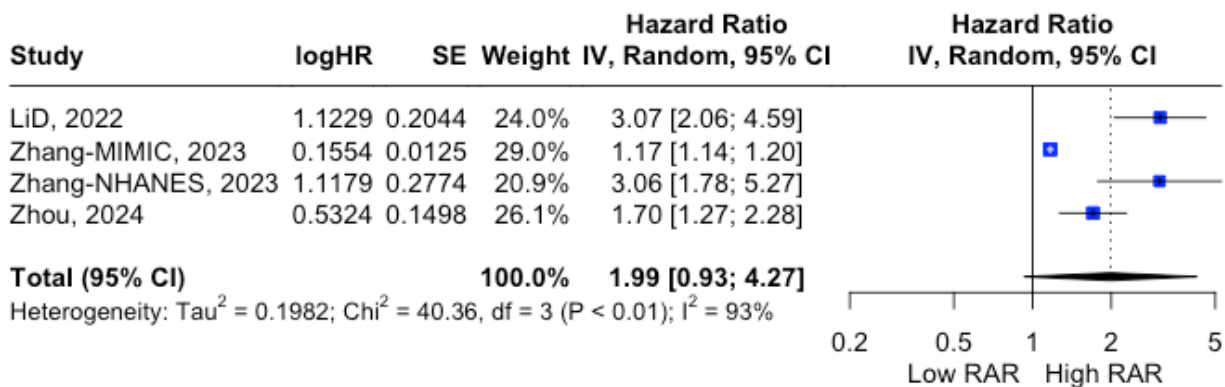**Figure S5.** Forest plot of in-hospital mortality pooled HR using random-effect model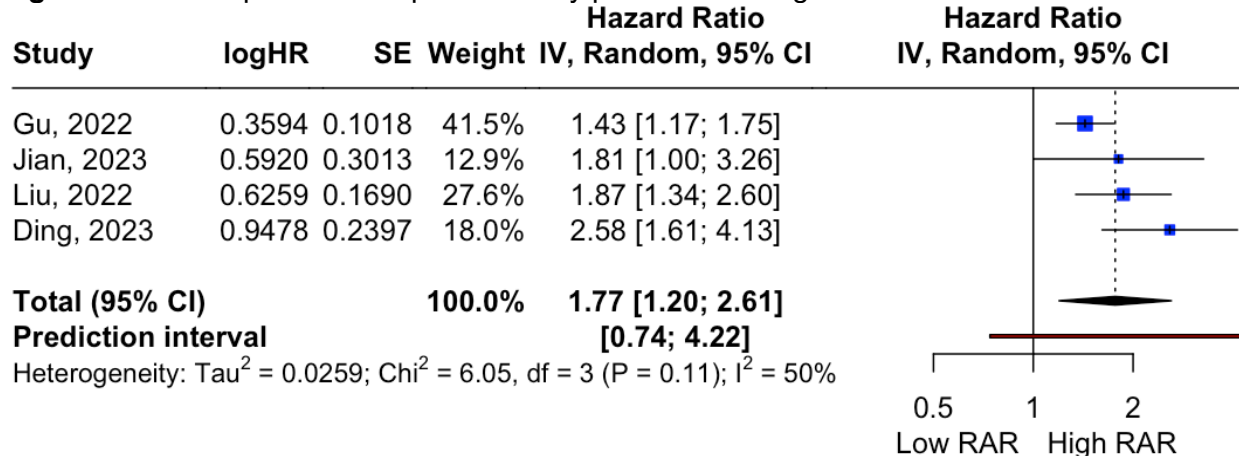

## SECONDARY ENDPOINTS

**Figure S6.** Forest plot of length of ICU stay using random-effect model

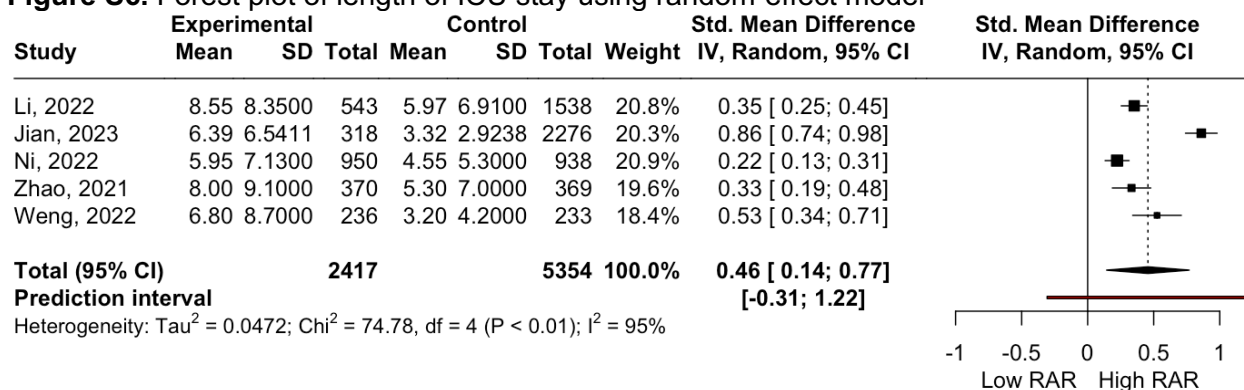

**Figure S7.** Forest plot of length of hospital stay using random-effect model

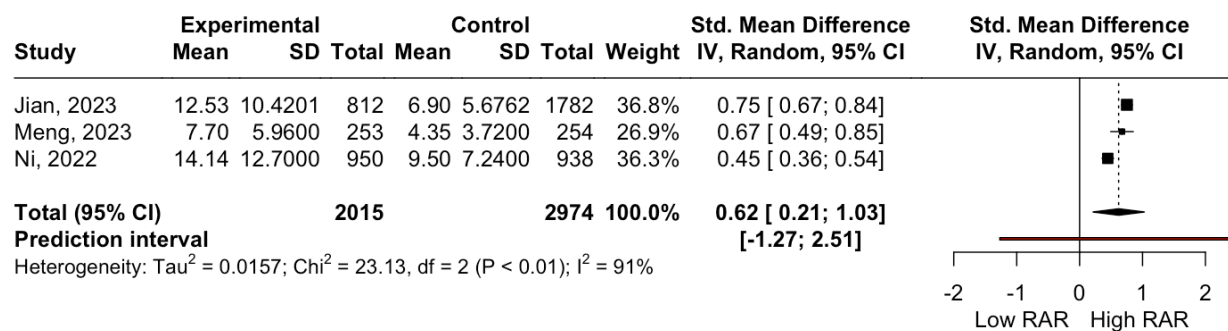

## SENSITIVITY ANALYSIS

**Table S4.** Results comparison of different meta-analysis models and between-study variance estimators

| Models                    | Between-study variance estimators  | Hazard Ratio<br>(18 inputs<br>from 16<br>studies) | Heterogeneity  |                  |        | Adjusted* Hazard<br>Ratio<br>(16 inputs from 16<br>studies) | Heterogeneity  |                  |       |
|---------------------------|------------------------------------|---------------------------------------------------|----------------|------------------|--------|-------------------------------------------------------------|----------------|------------------|-------|
|                           |                                    | TE (95%CI)                                        | I <sup>2</sup> | tau <sup>2</sup> | p      | TE (95%CI)                                                  | I <sup>2</sup> | tau <sup>2</sup> | p     |
| Random<br>Effects -<br>IV | PM + HK<br>adjustment<br>(default) | 1.88 (1.59 -<br>2.23)                             |                | 0.08             | <0.000 | 2.02 (1.75 - 2.32)                                          |                | 0.03             | <0.00 |
|                           | DL + HK<br>adjustment              | 1.90 (1.61 -<br>2.26)                             | 91             | 0.10             | <0.000 | 2.02 (1.75 - 2.32)                                          | 58.6           | 0.03             | <0.00 |
|                           | REML + HK<br>adjustment            | 1.89 (1.59 -<br>2.24)                             | %              | 0.08             | <0.000 | 2.02 (1.76 - 2.33)                                          | %              | 0.03             | <0.00 |
| Fixed<br>Effects -<br>IV  | PM + HK<br>adjustment              | 1.22 (1.19 -<br>1.25)                             |                | 0.08             | <0.000 | 1.89 (1.75 - 2.05)                                          |                | 0.03             | <0.00 |

\*Removed Zhang-MIMIC, 2023 and Zhao (Ischemic), 2023

**Figure S8.** Leave-one-out meta-analysis

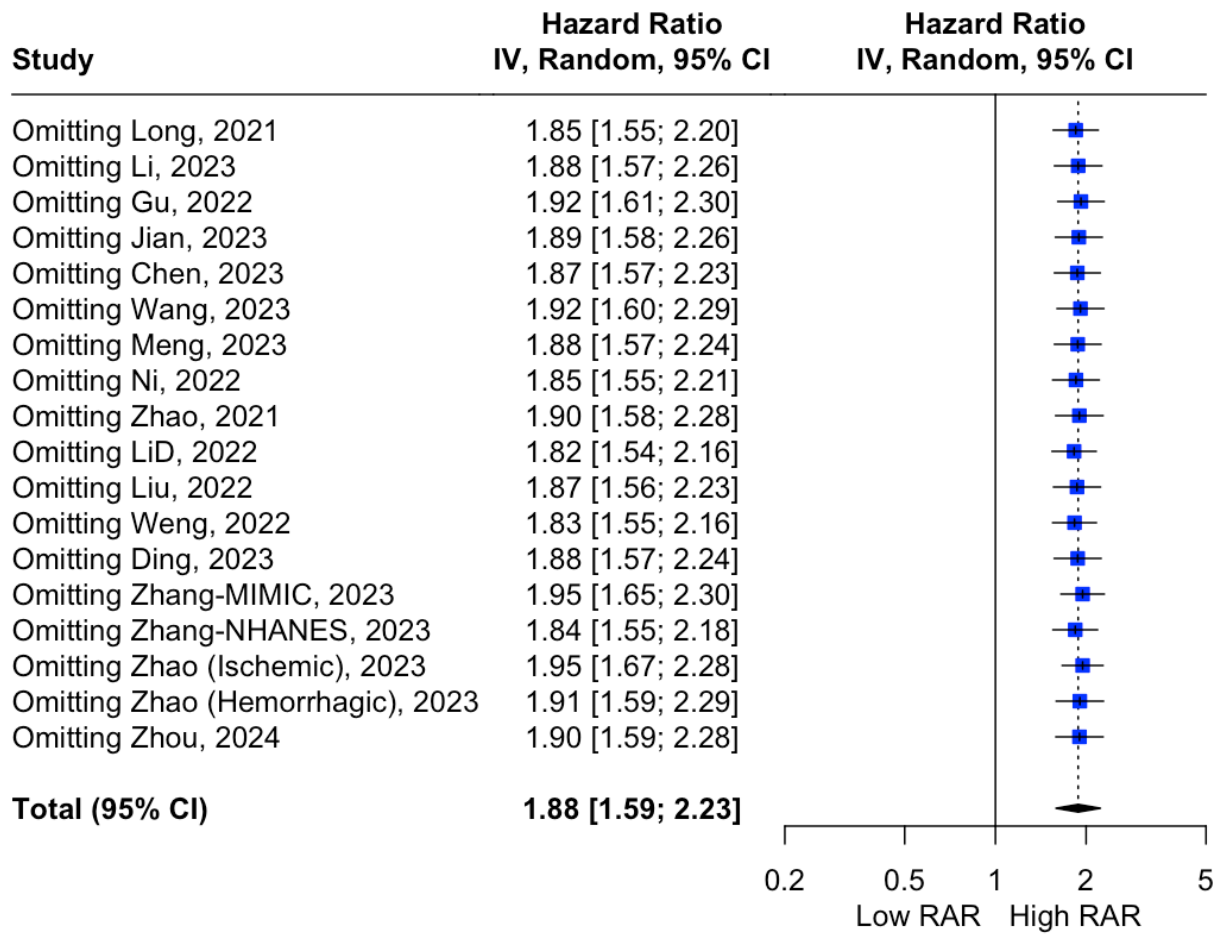



## META-REGRESSION

The missing data are imputed using the classification and regression trees (CART) method (Burgette and Reiter *et al.*, 2010). The imputation is performed in R ver. 4.3.2 using MICE package. The following are results from the imputation:

**Table S5.** Data used for meta-regression analysis\*

| Author                   | Follow-up      | Population | Age   | Male  | HR    | RR    | SBP    | Hb    | WBC   | HCT   | BUN   | SCr   |
|--------------------------|----------------|------------|-------|-------|-------|-------|--------|-------|-------|-------|-------|-------|
| Long, 2021               | within 3 years | 208        | 73.95 | 61.53 | 82.53 | 18.91 | 117.52 | 10.90 | 12.95 | 32.55 | 29.07 | 1.57  |
| Li, 2023                 | within 3 years | 2081       | 67.3  | 60.5  | 88.3  | 19    | 122    | 11.9  | 12.6  | 36.09 | 33    | 1.8   |
| Gu, 2022                 | within 30 days | 1522       | 74.2  | 62.5  | 93.2  | 19.05 | 121    | 11.2  | 12.60 | 34.5  | 29    | 1.35  |
| Jian, 2023               | within 3 years | 2594       | 66.35 | 37    | 86.43 | 19    | 112.38 | 13.1  | 11.2  | 33.49 | 23.5  | 1.26  |
| Chen, 2023               | within 30 days | 753        | 84.7  | 46.3  | 85.23 | 21.7  | 133.7  | 11.91 | 7.25  | 34.5  | 21    | 1.04  |
| Wang, 2023               | within 3 years | 953        | 73.35 | 55.83 | 92.45 | 21.12 | 120.75 | 10.92 | 11.79 | 33.96 | 28.5  | 1.25  |
| Meng, 2023               | within 3 years | 507        | 82.95 | 52.9  | 92.45 | 21.7  | 121    | 11    | 7     | 33.9  | 24    | 1.1   |
| Ni, 2022                 | within 3 years | 1888       | 72    | 55.44 | 84.84 | 19.94 | 114.75 | 9.85  | 10.57 | 29.67 | 36.43 | 1.88  |
| Zhao, 2021               | within 3 years | 739        | 66.3  | 55.07 | 83.61 | 19.05 | 125.09 | 12.4  | 14.7  | 36.84 | 27.61 | 1.5   |
| LiD, 2022                | within 3 years | 411        | 66.89 | 36.74 | 85.23 | 18.71 | 111.27 | 11.89 | 12.56 | 33.9  | 28    | 1.4   |
| Liu, 2022                | within 30 days | 943        | 67.3  | 49.2  | 86.43 | 19.8  | 117.52 | 12.03 | 11.63 | 36.69 | 25.78 | 1.45  |
| Weng, 2022               | within 3 years | 469        | 53.82 | 63.11 | 80.52 | 18.45 | 112.38 | 10.94 | 10.85 | 31.92 | 24.54 | 1.35  |
| Ding, 2023               | within 3 years | 515        | 61.43 | 51.1  | 97.8  | 21.7  | 124.94 | 10.88 | 11.96 | 29.67 | 21    | 0.95  |
| Zhang-MIMIC, 2023        | within 3 years | 6016       | 74.28 | 53.3  | 93.2  | 19.05 | 111.27 | 11.03 | 12.16 | 33.49 | 40.69 | 2.06  |
| Zhang-NHANES, 2023       | within 3 years | 1742       | 66.65 | 51.78 | 83.61 | 21.12 | 125.09 | 13.7  | 7.67  | 40.66 | 20.04 | 1.35  |
| Zhao (Ischemic), 2023    | within 30 days | 693        | 70.9  | 48.19 | 93.2  | 18.31 | 135.79 | 12.15 | 12.95 | 36.09 | 25    | 1.2   |
| Zhao (Hemorrhagic), 2023 | within 30 days | 908        | 65.68 | 53.3  | 92.45 | 17.87 | 139.92 | 12.98 | 14.7  | 38.02 | 19.5  | 0.975 |
| Zhou, 2024               | within 3 years | 2077       | 52.77 | 66.4  | 92.45 | 17.87 | 139.92 | 14.01 | 14.7  | 42.05 | 33    | 1.8   |

\*Values colored red were the imputed missing data

**Table S6.** Summary of meta-regression analysis

| Variables  | Effect estimates<br>(18 inputs from 16 studies) |                        |
|------------|-------------------------------------------------|------------------------|
|            | REML + Hartung-Knapp                            | REML w/o Hartung-Knapp |
|            |                                                 |                        |
| Population | 0.0750                                          | 0.0720                 |
| Age        | 0.4336                                          | 0.4310                 |
| Follow-up  | 0.1493                                          | 0.1453                 |
| HCT        | 0.4750                                          | 0.4804                 |
| Hemoglobin | 0.7585                                          | 0.7628                 |
| BUN        | 0.2751                                          | 0.2816                 |
| SCr        | 0.7432                                          | 0.7485                 |

Abbreviation: HR, heart rate; RR, respiratory rate; SBP, systolic blood pressure; Hb, haemoglobin; WBC, white blood cells; HCT, haematocrit; BUN, Blood Urea Nitrogen; SCr, Serum creatinine

## PUBLICATION BIAS

**Figure S9.** Funnel plot of overall mortality pooled HR using random-effect model

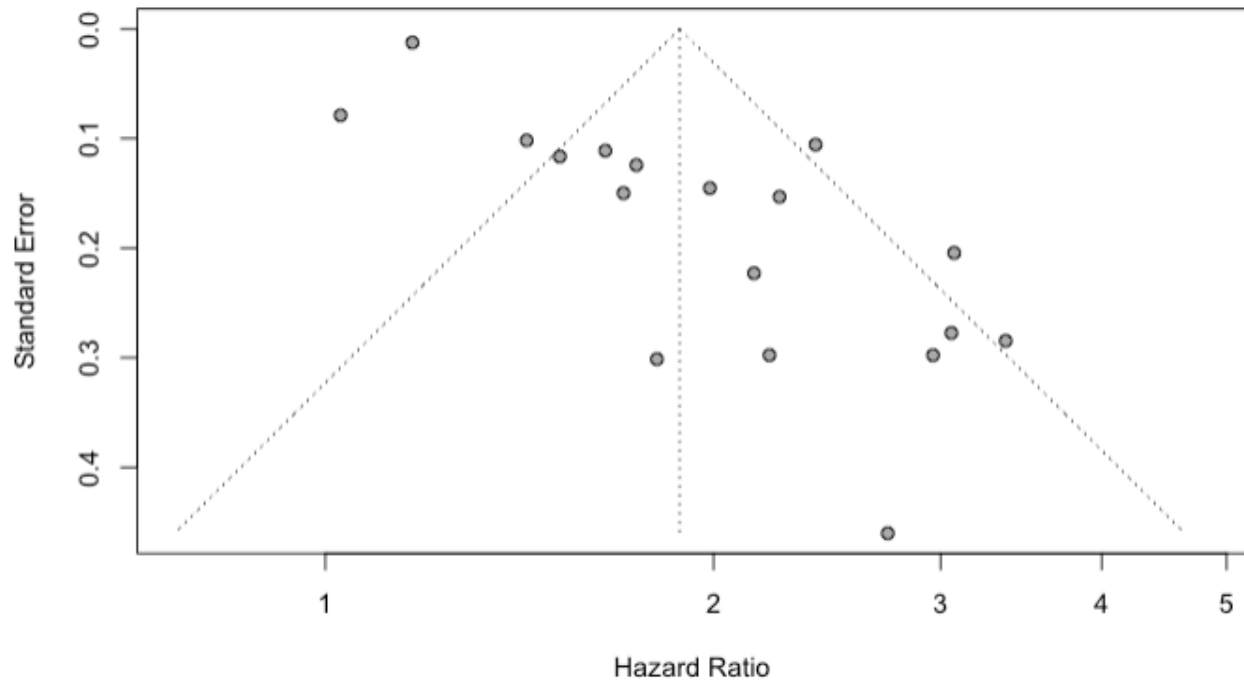

**Figure S10.** Funnel plot of 30-day mortality pooled HR using random-effect model

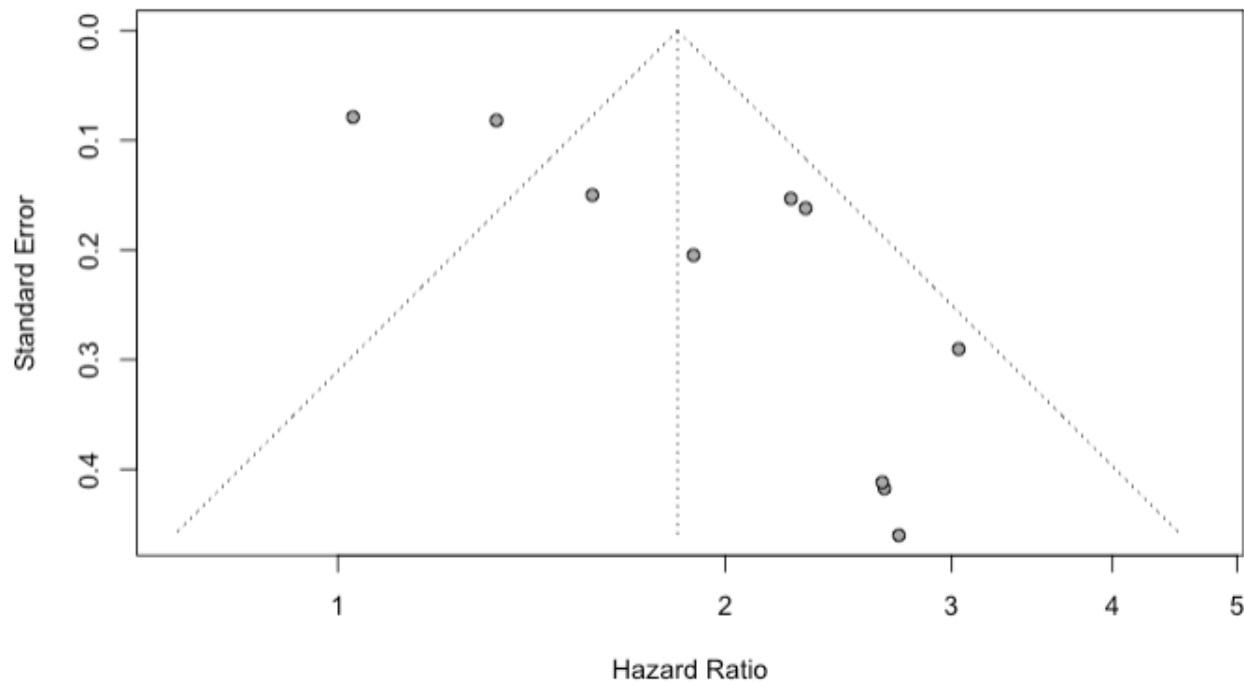

**Figure S11.** Funnel plot of 90-day mortality pooled HR using random-effect model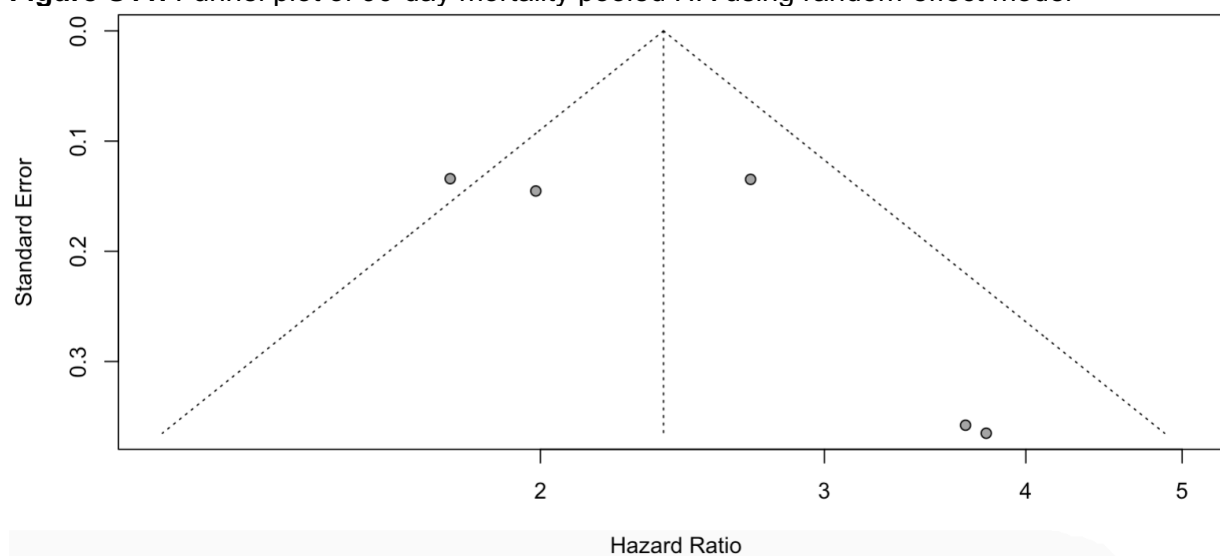**Figure S12.** Funnel plot of 1-year mortality pooled HR using random-effect model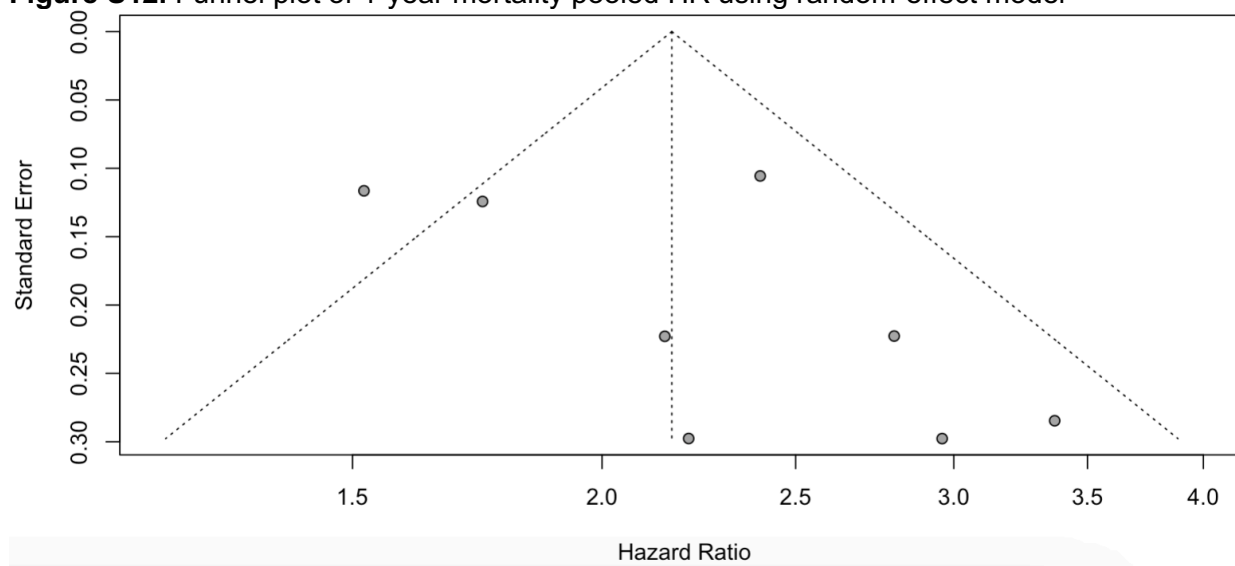

**Figure S13.** Funnel plot of 3-year mortality pooled HR using random-effect model

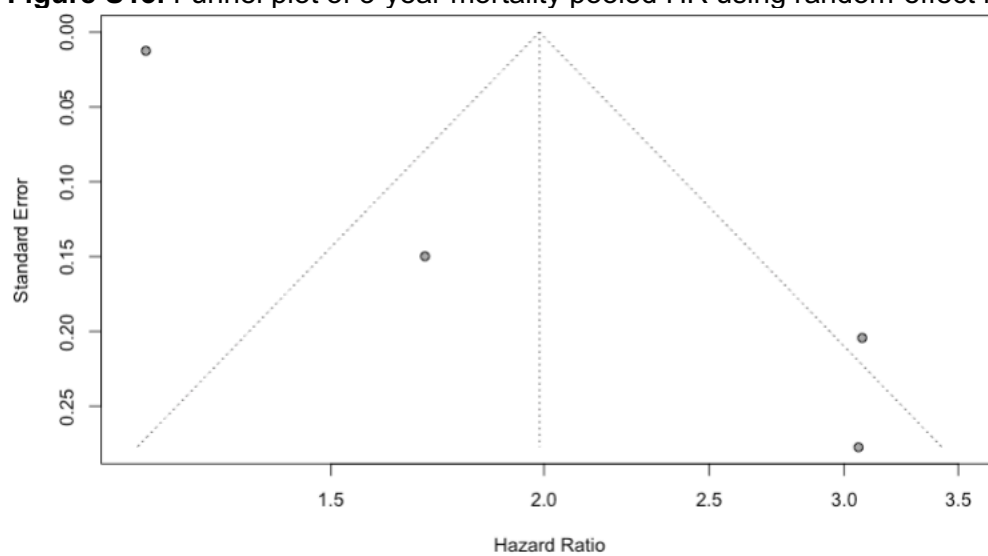

## PRISMA 2020 CHECKLIST

**Table S7.** PRISMA 2020 Checklist

| Section and Topic             | Item # | Checklist item                                                                                                                                                                                                                                                                                       | Location where item is reported |
|-------------------------------|--------|------------------------------------------------------------------------------------------------------------------------------------------------------------------------------------------------------------------------------------------------------------------------------------------------------|---------------------------------|
| <b>TITLE</b>                  |        |                                                                                                                                                                                                                                                                                                      |                                 |
| Title                         | 1      | Identify the report as a systematic review.                                                                                                                                                                                                                                                          | Title page                      |
| <b>ABSTRACT</b>               |        |                                                                                                                                                                                                                                                                                                      |                                 |
| Abstract                      | 2      | See the PRISMA 2020 for Abstracts checklist.                                                                                                                                                                                                                                                         | Abstract                        |
| <b>INTRODUCTION</b>           |        |                                                                                                                                                                                                                                                                                                      |                                 |
| Rationale                     | 3      | Describe the rationale for the review in the context of existing knowledge.                                                                                                                                                                                                                          | line 40-64                      |
| Objectives                    | 4      | Provide an explicit statement of the objective(s) or question(s) the review addresses.                                                                                                                                                                                                               | line 65-72                      |
| <b>METHODS</b>                |        |                                                                                                                                                                                                                                                                                                      |                                 |
| Eligibility criteria          | 5      | Specify the inclusion and exclusion criteria for the review and how studies were grouped for the syntheses.                                                                                                                                                                                          | line 80-90                      |
| Information sources           | 6      | Specify all databases, registers, websites, organisations, reference lists and other sources searched or consulted to identify studies. Specify the date when each source was last searched or consulted.                                                                                            | line 92-95                      |
| Search strategy               | 7      | Present the full search strategies for all databases, registers and websites, including any filters and limits used.                                                                                                                                                                                 | line 97-98;<br>Table 1          |
| Selection process             | 8      | Specify the methods used to decide whether a study met the inclusion criteria of the review, including how many reviewers screened each record and each report retrieved, whether they worked independently, and if applicable, details of automation tools used in the process.                     | line 93-101                     |
| Data collection process       | 9      | Specify the methods used to collect data from reports, including how many reviewers collected data from each report, whether they worked independently, any processes for obtaining or confirming data from study investigators, and if applicable, details of automation tools used in the process. | line 99-101                     |
| Data items                    | 10a    | List and define all outcomes for which data were sought. Specify whether all results that were compatible with each outcome domain in each study were sought (e.g. for all measures, time points, analyses), and if not, the methods used to decide which results to collect.                        | line 103-107;<br>line 145-148   |
|                               | 10b    | List and define all other variables for which data were sought (e.g. participant and intervention characteristics, funding sources). Describe any assumptions made about any missing or unclear information.                                                                                         | Line 105-107;<br>line 165-168   |
| Study risk of bias assessment | 11     | Specify the methods used to assess risk of bias in the included studies, including details of the tool(s) used, how many reviewers assessed each study and whether they worked independently, and if applicable, details of automation tools used in the process.                                    | line 109-113                    |
| Effect measures               | 12     | Specify for each outcome the effect measure(s) (e.g. risk ratio, mean difference) used in the synthesis or presentation of results.                                                                                                                                                                  | line 114-127                    |
| Synthesis methods             | 13a    | Describe the processes used to decide which studies were eligible for each synthesis (e.g. tabulating the study intervention characteristics and comparing against the planned groups for each synthesis (item #5)).                                                                                 | line 119-138                    |
|                               | 13b    | Describe any methods required to prepare the data for presentation or synthesis, such as handling of missing summary statistics, or data                                                                                                                                                             | line 119-138;                   |

| Section and Topic             | Item # | Checklist item                                                                                                                                                                                                                                                                       | Location where item is reported                                                        |
|-------------------------------|--------|--------------------------------------------------------------------------------------------------------------------------------------------------------------------------------------------------------------------------------------------------------------------------------------|----------------------------------------------------------------------------------------|
|                               |        | conversions.                                                                                                                                                                                                                                                                         | line 124-126;<br>line 165-168                                                          |
|                               | 13c    | Describe any methods used to tabulate or visually display results of individual studies and syntheses.                                                                                                                                                                               | line 119-138                                                                           |
|                               | 13d    | Describe any methods used to synthesize results and provide a rationale for the choice(s). If meta-analysis was performed, describe the model(s), method(s) to identify the presence and extent of statistical heterogeneity, and software package(s) used.                          | line 119-181                                                                           |
|                               | 13e    | Describe any methods used to explore possible causes of heterogeneity among study results (e.g. subgroup analysis, meta-regression).                                                                                                                                                 | line 143-144;<br>line 176-177                                                          |
|                               | 13f    | Describe any sensitivity analyses conducted to assess robustness of the synthesized results.                                                                                                                                                                                         | line 170-176                                                                           |
| Reporting bias assessment     | 14     | Describe any methods used to assess risk of bias due to missing results in a synthesis (arising from reporting biases).                                                                                                                                                              | line 178-181                                                                           |
| Certainty assessment          | 15     | Describe any methods used to assess certainty (or confidence) in the body of evidence for an outcome.                                                                                                                                                                                | Not Applicable                                                                         |
| <b>RESULTS</b>                |        |                                                                                                                                                                                                                                                                                      |                                                                                        |
| Study selection               | 16a    | Describe the results of the search and selection process, from the number of records identified in the search to the number of studies included in the review, ideally using a flow diagram.                                                                                         | line 183-192,<br>Figure 1                                                              |
|                               | 16b    | Cite studies that might appear to meet the inclusion criteria, but which were excluded, and explain why they were excluded.                                                                                                                                                          | Figure 1                                                                               |
| Study characteristics         | 17     | Cite each included study and present its characteristics.                                                                                                                                                                                                                            | Table 2                                                                                |
| Risk of bias in studies       | 18     | Present assessments of risk of bias for each included study.                                                                                                                                                                                                                         | Supplementary Table 1                                                                  |
| Results of individual studies | 19     | For all outcomes, present, for each study: (a) summary statistics for each group (where appropriate) and (b) an effect estimate and its precision (e.g. confidence/credible interval), ideally using structured tables or plots.                                                     | Figure 2,<br>Figure 3                                                                  |
| Results of syntheses          | 20a    | For each synthesis, briefly summarise the characteristics and risk of bias among contributing studies.                                                                                                                                                                               | Table 2,<br>Supplementary Table 1                                                      |
|                               | 20b    | Present results of all statistical syntheses conducted. If meta-analysis was done, present for each the summary estimate and its precision (e.g. confidence/credible interval) and measures of statistical heterogeneity. If comparing groups, describe the direction of the effect. | line 207-267,<br>Figure 2-4,<br>Supplementary Table 2-4 & 6,<br>Supplementary Figure 8 |
|                               | 20c    | Present results of all investigations of possible causes of heterogeneity among study results.                                                                                                                                                                                       | line 208-267                                                                           |
|                               | 20d    | Present results of all sensitivity analyses conducted to assess the robustness of the synthesized results.                                                                                                                                                                           | line 255-262                                                                           |
| Reporting biases              | 21     | Present assessments of risk of bias due to missing results (arising from reporting biases) for each synthesis assessed.                                                                                                                                                              | line 264-267                                                                           |

| Section and Topic                              | Item # | Checklist item                                                                                                                                                                                                                             | Location where item is reported                |
|------------------------------------------------|--------|--------------------------------------------------------------------------------------------------------------------------------------------------------------------------------------------------------------------------------------------|------------------------------------------------|
|                                                |        |                                                                                                                                                                                                                                            | Supplementary Figure 9-13                      |
| Certainty of evidence                          | 22     | Present assessments of certainty (or confidence) in the body of evidence for each outcome assessed.                                                                                                                                        | Not Applicable                                 |
| <b>DISCUSSION</b>                              |        |                                                                                                                                                                                                                                            |                                                |
| Discussion                                     | 23a    | Provide a general interpretation of the results in the context of other evidence.                                                                                                                                                          | line 279-329                                   |
|                                                | 23b    | Discuss any limitations of the evidence included in the review.                                                                                                                                                                            | line 331-343                                   |
|                                                | 23c    | Discuss any limitations of the review processes used.                                                                                                                                                                                      | line 331-343                                   |
|                                                | 23d    | Discuss implications of the results for practice, policy, and future research.                                                                                                                                                             | line 319-320,<br>line 326-329,<br>line 341-360 |
| <b>OTHER INFORMATION</b>                       |        |                                                                                                                                                                                                                                            |                                                |
| Registration and protocol                      | 24a    | Provide registration information for the review, including register name and registration number, or state that the review was not registered.                                                                                             | line 74-78                                     |
|                                                | 24b    | Indicate where the review protocol can be accessed, or state that a protocol was not prepared.                                                                                                                                             | line 74-78                                     |
|                                                | 24c    | Describe and explain any amendments to information provided at registration or in the protocol.                                                                                                                                            | Not Applicable                                 |
| Support                                        | 25     | Describe sources of financial or non-financial support for the review, and the role of the funders or sponsors in the review.                                                                                                              | line 372                                       |
| Competing interests                            | 26     | Declare any competing interests of review authors.                                                                                                                                                                                         | line 372                                       |
| Availability of data, code and other materials | 27     | Report which of the following are publicly available and where they can be found: template data collection forms; data extracted from included studies; data used for all analyses; analytic code; any other materials used in the review. | line 369, line 374<br>Supplementary materials  |
